# Supplementary material for: Correlates of Patient-Centered Care Practices at U.S. Substance Use Disorder Clinics
Source: Atypon-hosted journal article supplement (doi:10.1176/appi.ps.201900121), 2019-09-10
Supplement: appi.ps.201900121.ds001.pdf [file appi.ps.201900121.ds001.pdf]

**Appendix**

## Original supervisor survey questions concerning patient-centered care practice

Q. To what extent do you think the following statements correspond to your own experience working in your unit?

(1=strongly disagree, 2=disagree, 3=neither agree or disagree, 4=agree, 5=strongly agree)

|                                                                                                                                 | Mean | Standard Deviation | Range |
|---------------------------------------------------------------------------------------------------------------------------------|------|--------------------|-------|
| The quality of the interaction between staff and clients is more important than getting the tasks done.                         | 3.80 | 0.96               | 1-5   |
| We are free to alter work routines based on clients' preferences.                                                               | 3.60 | 0.96               | 1-5   |
| Clients are offered the opportunity to receive individualized services.                                                         | 4.49 | 0.60               | 2-5   |
| Assessment of clients' needs is undertaken very frequently.                                                                     | 4.28 | 0.75               | 1-5   |
| We have to get some basic work done before we think about clients' specific preferences. <sup>a</sup>                           | 4.37 | 0.84               | 1-5   |
| We discuss with our clients multiple options for treating their substance use disorder.                                         | 4.24 | 0.70               | 1-5   |
| This organization prevents staff from explaining the advantages and disadvantages of treatment options to clients. <sup>a</sup> | 4.36 | 0.91               | 1-5   |
| We help our clients understand all information provided.                                                                        | 4.45 | 0.57               | 1-5   |
| We ask our clients which treatment option(s) he/she prefers.                                                                    | 4.17 | 0.74               | 1-5   |
| This organization encourages joint patient-staff agreement on treatment plans.                                                  | 4.43 | 0.62               | 2-5   |

<sup>a</sup>Reverse coded.
